# 1 ViDGER: An R package for integrative interpretation of differential 2 gene expression results of RNA-seq data

3 Adam McDermaid\*, Brandon Monier\*, Jing Zhao, and Qin Ma

4 Adam McDermaid, Department of Mathematics and Statistics, South Dakota State University, Brookings, SD,  
5 57006, USA; Tel: 1-605-688-4357; Email: [Adam.McDermaid@sdstate.edu](mailto:Adam.McDermaid@sdstate.edu);

6 Brandon Monier, Department of Biology & Microbiology, South Dakota State University, Brookings, SD, 57006,  
7 USA; Tel: 712-461-2851; Email: [Brandon.Monier@sdstate.edu](mailto:Brandon.Monier@sdstate.edu);

8 Jing Zhao, Population Health Group, Sanford Research, Sioux Falls, SD, 57104, USA; Department of Internal  
9 Medicine, Sanford School of Medicine, University of South Dakota, Sioux Falls, SD, 57105, USA. Tel: 1-605-  
10 312-6468; E-mail: [jing.zhao@sanfordhealth.org](mailto:jing.zhao@sanfordhealth.org);

11 Qin Ma, Corresponding Author, Bioinformatics and Mathematical Biosciences Lab, Department of Agronomy,  
12 Horticulture, and Plant Science, South Dakota State University, Brookings, SD, 57006, USA; Tel: 1-605-688-  
13 6315; Email: [qin.ma@sdstate.edu](mailto:qin.ma@sdstate.edu);

14 \*These authors contributed equally to this work.

15  
16 **Keywords:** *differential gene expression analysis, differentially expressed genes, bioinformatics tools,*  
17 *computational pipeline.*

18  
19 Adam McDermaid is a Ph.D. student in the Department of Mathematics and Statistics at South Dakota State  
20 University, Brookings, SD, USA;

21 Brandon Monier is a Ph.D. student in the Department of Biology and Microbiology at South Dakota State  
22 University, SD, USA;

23 Jing Zhao is an assistant research scientist at Sanford Research, and an assistant professor at the  
24 Department of Internal Medicine, University of South Dakota Sanford School of Medicine.

25 Qin Ma is the director of the Bioinformatics and Mathematical Biosciences Lab and an assistant professor at

the Department of Agronomy, Horticulture, and Plant Science, South Dakota State University. He is also an adjunct faculty member of the Department of Mathematics and Statistics of SDSU, BioSNTR, and Sanford Research, USA.

## Abstract

Differential gene expression (**DGE**) is one of the most common applications of RNA-sequencing (RNA-seq) data. This process allows for the elucidation of differentially expressed genes (**DEGs**) across two or more conditions. Interpretation of the DGE results can be non-intuitive and time consuming due to the variety of formats based on the tool of choice and the numerous pieces of information provided in these results files. Here we present an R package, **VIDGER** (Visualization of Differential Gene Expression Results using R), which contains nine functions that generate information-rich visualizations for the interpretation of DGE results from three widely-used tools, *Cuffdiff*, *DESeq2*, and *edgeR*.

## Introduction

Next-generation sequencing techniques enable researchers to access far more massive amounts of data than previously available. Specifically, RNA-seq procedures provide a plethora of information regarding the genetic expression levels of various organisms across multiple conditions at a high resolution [1, 2]. Naturally arising from this information is the concept of DEGs, which are genes that have expression levels determined to be significantly differentially expressed across two or more conditions. *Cuffdiff* [3, 4], *edgeR* [5], and *DESeq2* [6] are three widely-used tools to determine which genes are differentially expressed, based on quantifications of expressed genes derived from computational analyses of raw RNA-seq reads (e.g., mapping [7-15] and assembly [16-21]). Each of the three has been shown to be among the highest performing tools for DGE analysis of RNA-seq data [22-24] and contribute to the highest number of citations for DGE tools (Table 1), representing roughly 80% of all cited DGE tools. However, interpreting the results files from each program is not entirely intuitive, especially for researchers who have limited computational backgrounds.

51 One of the best ways to provide a summary of the DGE results is to generate figures, giving a global  
52 representation of the expression changes across multiple conditions. The three tools create output files  
53 sharing some information, such as mean gene expression across replicates for each sample,  $\log_2$  fold  
54 change (*lfc*), and adjusted *p*-value. However, these output files have many differences in content and  
55 structure, which makes generating comprehensive visualizations time-intensive and potentially challenging  
56 task. *CummeRbund* [25] is an available tool to generate visualizations for *Cuffdiff* outputs but has no  
57 functionality for users of *edgeR* and *DESeq2*. This limited functionality leaves many researchers with no  
58 readily available method to create visualizations for their DGE results. To remediate this issue, we have  
59 created an R package, **VIDGER**, to assist users in generating publication-quality visualizations from *Cuffdiff*,  
60 *edgeR*, and *DESeq2* capable of providing valuable insight into their generated DGE results.

61  
62 **Table 1.** Citation counts, percentages of commonly referenced DGE tool citations, and year of release for *edgeR* [5],  
63 *Cuffdiff*/*Cuffdiff2* [3, 4], *DESeq2* [6], *limma* [26], *DEGseq* [27], *baySeq* [28], *SAMseq* [29], and *NOIseq* [30]. All counts  
64 were tabulated using the Google Scholar citation counts for the respective tool references as of Feb. 2, 2018.

| DGE Tool                                  | Citation Count | Percentage | Publish Year |
|-------------------------------------------|----------------|------------|--------------|
| <i>edgeR</i> [5]                          | 7,032          | 32.4%      | 2010         |
| <i>Cuffdiff</i> / <i>Cuffdiff2</i> [3, 4] | 6,001          | 27.7%      | 2012/2013    |
| <i>DESeq2</i> [6]                         | 4,195          | 19.3%      | 2014         |
| <i>limma</i> [26]                         | 2,369          | 10.9%      | 2015         |
| <i>DEGseq</i> [27]                        | 1,229          | 5.7%       | 2009         |
| <i>baySeq</i> [28]                        | 561            | 2.6%       | 2010         |
| <i>SAMseq</i> [29]                        | 274            | 1.3%       | 2013         |
| <i>NOIseq</i> [30]                        | 38             | 0.2%       | 2012         |

65  
66 This package can generate six different types of expression-based visualizations—boxplots, scatterplots,  
67 DEG counts, MA plots, volcano plots, and Four-way plots—as shown in Figure 1 and Examples S1-S9.  
68 Additionally, matrices of all pair-wise comparisons can be generated with scatterplots, MA plots, and volcano

plots (Examples S4, S7, and S9, respectively). All the visualizations can be classified into two tiers, with the Tier 1 functions (Figure 1A-C, Examples S2-S5) representing more basic information, whereas the Tier 2 functions (Figure 1D-F, Examples S6-S10) being used to derive more advanced information with  $p$ -values, fold changes, and mean expression values (Method S1). All generated figures and extracted data can then be saved and used for further purposes, including reports and publications.

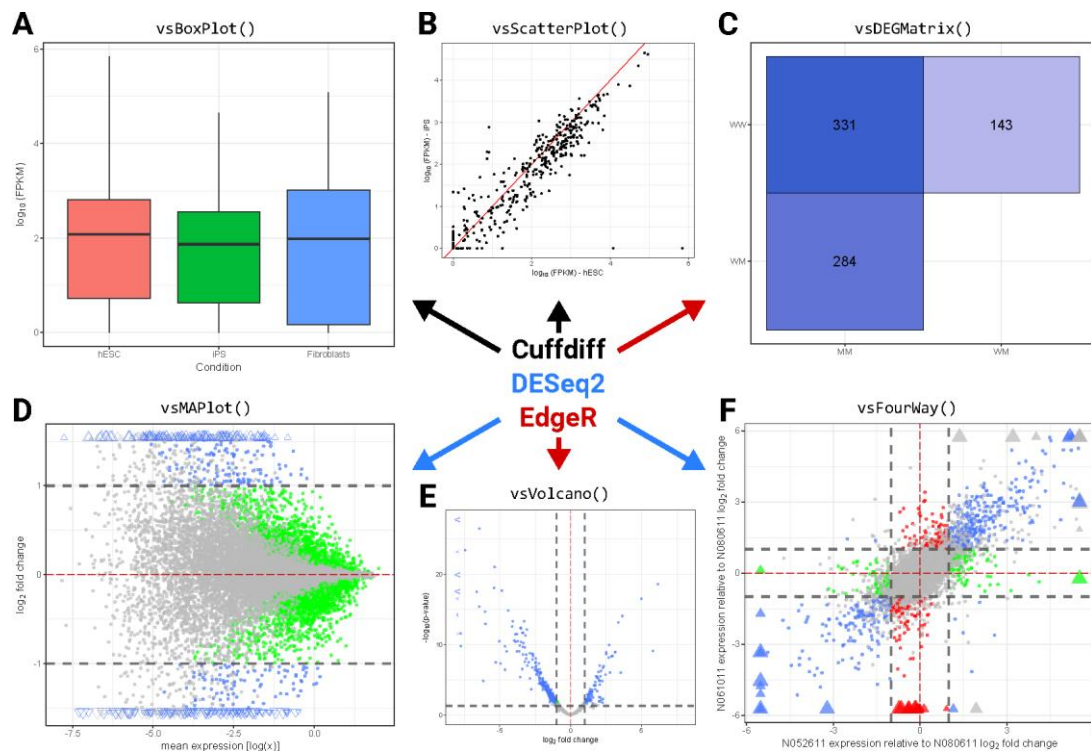

**Figure 1.** (A) Boxplot generation of RNA-seq data using *vsBoxplot*; (B) scatterplot generation using *vsScatterPlot*; (C) differential gene expression matrix using *vsDEGMatrix*; (D) MA plot generation using *vsMAPlot*; (E) volcano plot generation using *vsVolcano*; (F) four-way plot generation using *vsFourWay*. Arrow and text color refer to visualizations generated using *Cuffdiff* data (black), *DESeq2* data (blue), and *edgeR* data (red).

## Functions and Methods

Nine functions are included in **ViDGER**, each of which is capable of using *Cuffdiff*, *DESeq2*, and *edgeR* objects. Included in the ViDGER package are three toy datasets representing the three DGE tools object types. Specifically, *df.cuff* is based on *Cuffdiff* data from the *cummeRbund* package [25]; *df.deseq* is a *DESeqDataSet* object based on gene expression data from the *pasilla* package [31]; *df.edger* is an example *DGEList* object derived from the *edgeR* package (Example S1). In addition to the toy data sets, we tested ViDGER on five real-world data sets, consisting of one human, one *M. domestica*, and three *V. riparia*

87 datasets (Example S1). It is important to note that the input data for this package should be the direct output  
88 and of one of the classes corresponding to the specific tool used (DESeqDataSet, DGEList or other edgeR  
89 objects, or Cuffdiff object) and not a basic matrix or data frame containing the results of these tools. The  
90 following examples are illustrated using the *df.deseq* object, with full demonstrations with the *Cuffdiff*,  
91 *DESeq2*, and *edgeR* objects found in the supplementary file (Examples S2-S10).

## 93 Tier I Functions

94 (i) ***vsBoxPlot*** visualizes  $\log_{10}$  distributions for treatments in an experiment as box and whisker diagrams  
95 (Figure 2, Example S2), where only the data frame and analytical type are needed unless using a DESeq2  
96 object where the factor is also required. This figure is useful for determining the distribution of mapped read  
97 counts for each treatment in an experiment and can highlight specific samples that have distributions differing  
98 significantly from what is expected or what is displayed with the other samples. Visualizing this information  
99 can provide insight into the base quality of the read distributions to ensure semi-consistent sample-based  
100 quality levels. The *DESeq2* object (*df.deseq*) is used in the following example, and the factor variable, *d.factor*,  
101 for the treatments need to be specified.

```
102 vsBoxPlot(data = df.deseq, d.factor = 'condition', type = 'deseq')
```

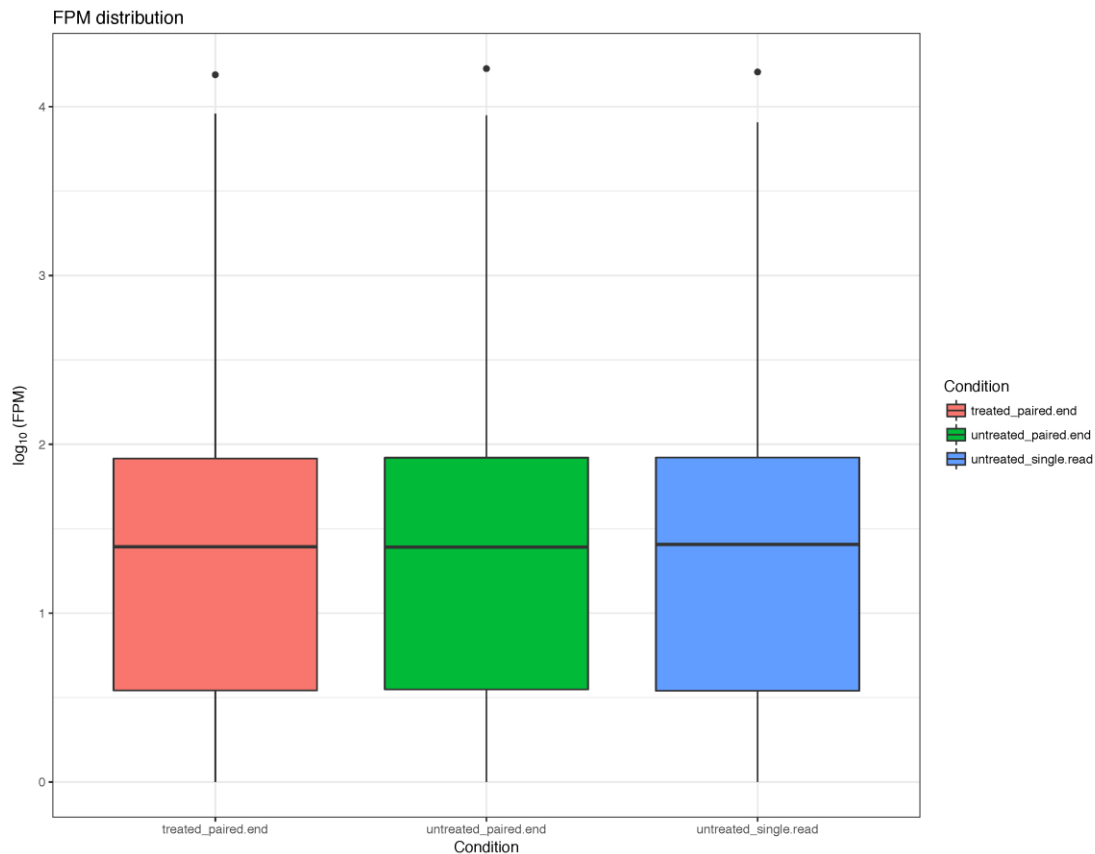

103

104

105

106

**Figure 2.** Visualization generated by the *vsBoxPlot* function from the *ViDGER* package using a DESeq2 dataset, requiring a dataset, factor type, and appropriate tool type. Optional parameters include inclusion/exclusion of the main title, legend, and grid.

107

108

109

110

111

112

113

114

115

116

117

**(ii) vsScatterPlot** creates a scatterplot of  $\log_{10}$  comparison of either FPKM (Reads Per Kilobase of transcript per Million mapped reads) or CPM (cost per thousand impressions) measurements for two treatments depending on analytical type (Figure 3, Example S3). This function can be used to compare measurements of mapped reads to transcripts from two treatments, which allows for a global view of the expression similarity between the two selected treatments. Scatterplots that generate most data points falling along the diagonal indicate more similar expression patterns for the two treatments, whereas data points falling further from the diagonal would indicate relatively less similar expression levels. By stating x and y treatment variables and/or the data source, we can generate a scatterplot of the pairwise x vs. y comparison.

116

```
vsScatterPlot (x = 'treated_paired.end', y = 'untreated_paired.end', data = df.deseq, type = 'deseq', d.factor =
```

117

```
'condition')
```

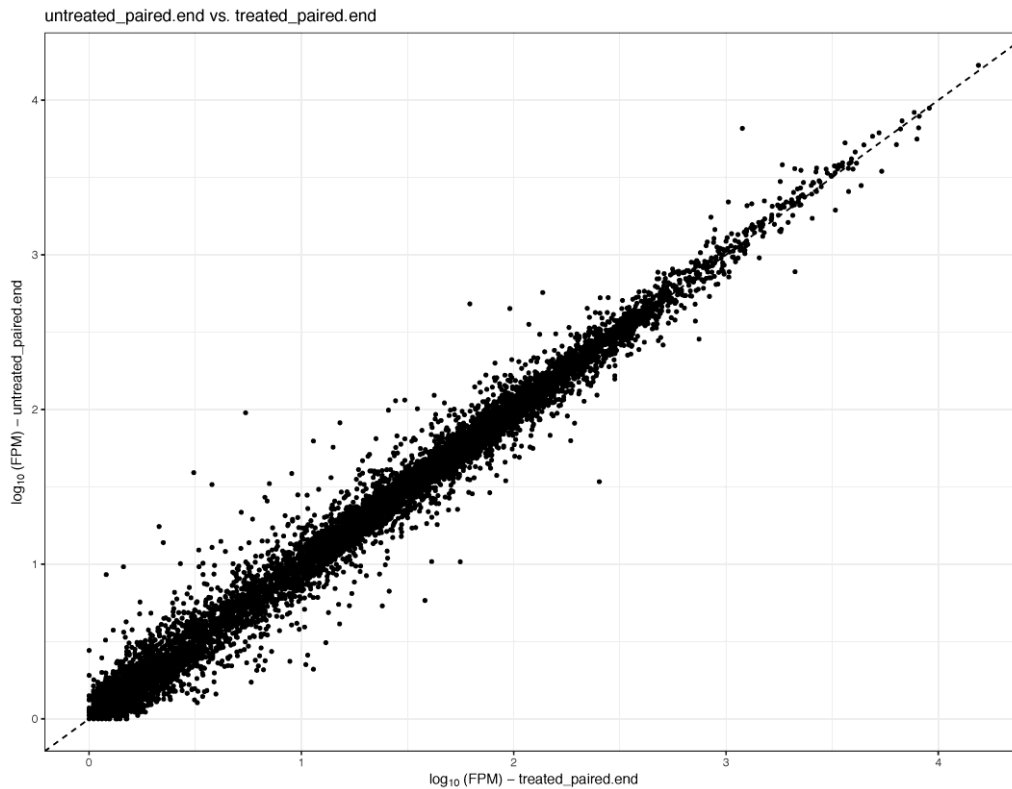

118

119

**Figure 3.** Visualization generated by the *vsScatterPlot* function from the ViDGER package using a DESeq2 dataset, requiring a dataset, factor type, two factor levels, and appropriate tool type. Optional parameters include inclusion/exclusion of the main title and grid.

122

123

**(iii) vsScatterMatrix** generates a matrix of scatterplots for all possible treatment combinations with additional distribution information (Figure 4, Example S4). In addition to the scatterplots which are generated as with the *vsScatterPlot* function, the matrix option provides FPKM/CPM distributions for each sample and correlation values for each pairwise comparison. This approach allows for a view of each relative expression pattern and correlation all in one visualization.

128

```
vsScatterMatrix(data = df.deseq, d.factor = 'condition', type = 'deseq')
```

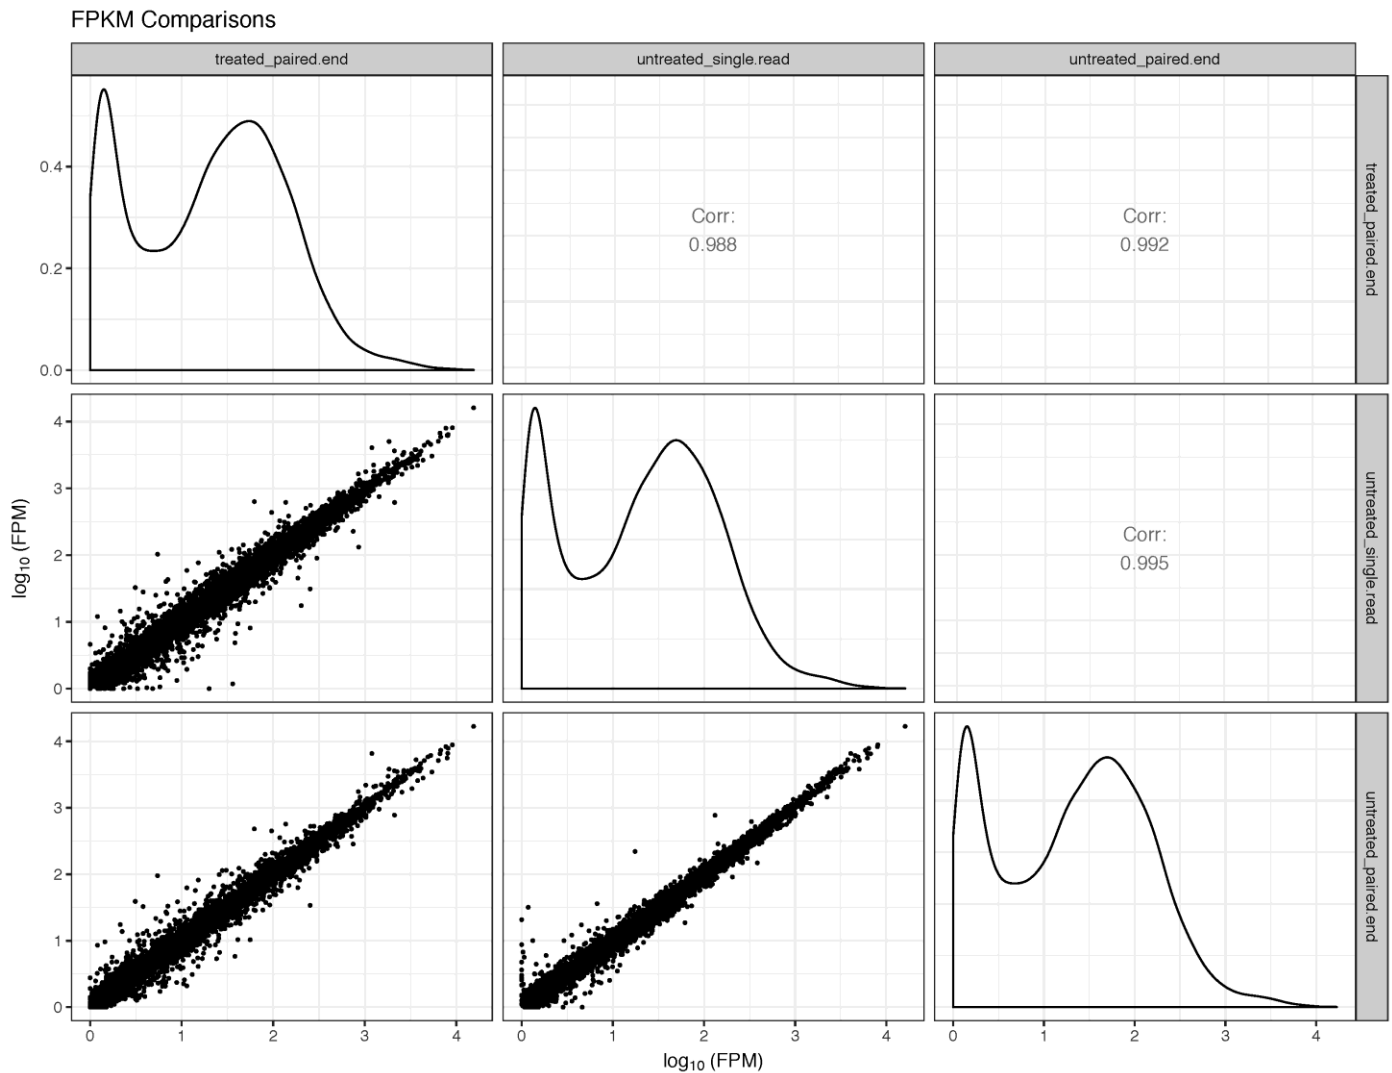

129

130

131

132

133

134

135

136

137

138

139

140

141

142

**Figure 4.** Visualization generated by the *vsScatterMatrix* function from the *ViDGER* package using a *DESeq2* dataset, requiring a dataset, factor type, and appropriate tool type. Optional parameters include inclusion/exclusion of the main title, legend, and grid, manual specification of the main title, and manual specification of comparisons of interest. In addition to the pairwise scatterplots, density plots are provided along the diagonal and pairwise correlation values are provided in the opposite half of the matrix.

**(iv) *vsDEGMatrix*** visualizes the number of DEGs at a specified adjusted *p*-value for each treatment comparison (Figure 5, Example S5). It can be utilized to quantify the number of significantly DEGs for each comparison and provides a heatmap-based color scheme with a gradient to represent the relative magnitude of DEGs for each comparison. Like the other matrix functions, data specification and analytical type are required. The user can also specify an adjusted *p*-value which defaults to 0.05.

```
vsDEGMatrix(data = df.deseq, d.factor = 'condition', type='deseq')
```



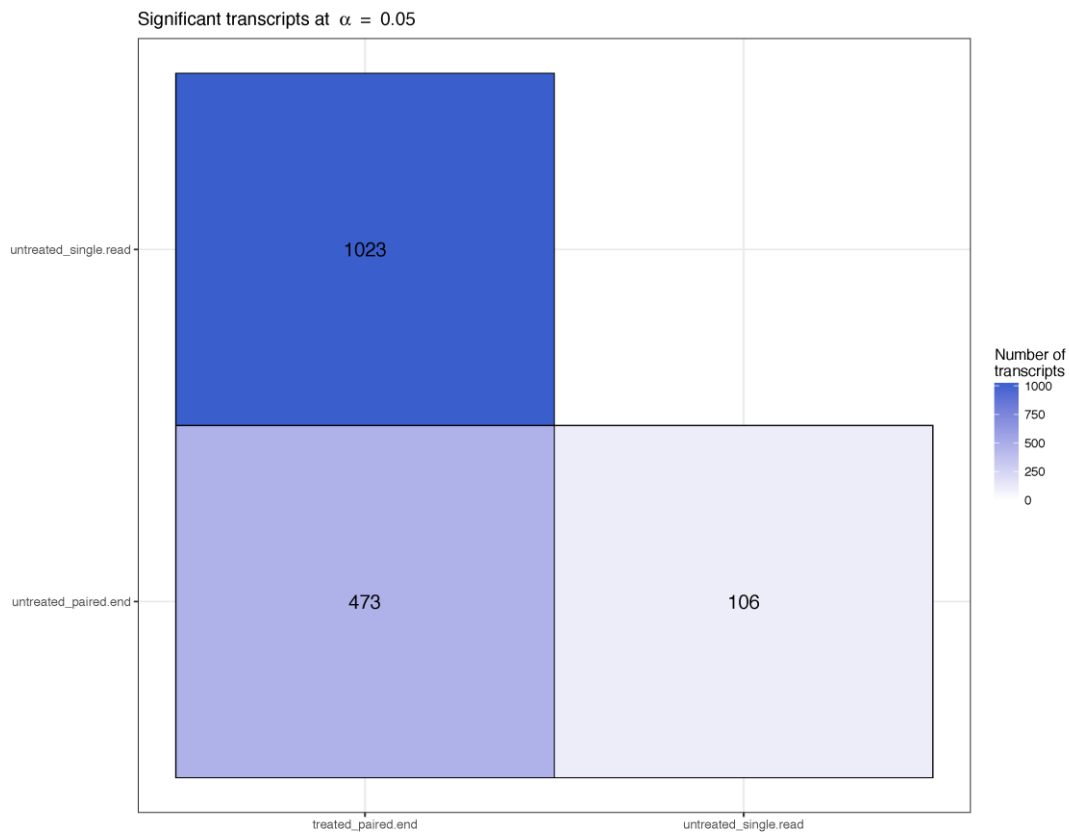

143

144

**Figure 5.** Visualization generated by the *vsDEGMatrix* function from the ViDGER package using a DESeq2 dataset, requiring a dataset, factor type, and appropriate tool type. Optional parameters include inclusion/exclusion of the main title, legend, and grid and specification of adjusted  $p$ -value cutoff (default is 0.05).

145

146

147

148

## Tier II Functions

149

150

**(v) vsMAPlot** creates an MA plot, which is a scatter plot with M (log ratio) and A (mean average) scales, of *lfc* versus normalized mean counts (Figure 6, Example S6). In addition to the basic plotting of the data points relative to the mean expression values and *lfc*, the *vsMAPlot* function also integrates visualization features that allow for a better understanding of the data. Data points in the MA plot are colored based on thresholds for the adjusted  $p$ -value and *lfc* of the gene in the indicated comparison to provide valuable global interpretability. Additionally, it is inevitable with most datasets that some points will be extreme relative to the majority of the data, which caused problems when generating visualizations. To address this issue, *vsMAPlot* scales the window based on the bulk of the data and represents outliers with distinct data points, indicating the magnitude of the outlier based on the size of the point. This process allows for the visualization to present the majority of the

156

157

158

159 information in a viewable, usable format that is robust to outliers. Visualizing the data through this  
160 approach allows for the comparison of two treatment groups relative to the mean expression value  
161 and *lfc*. The *x* and *y* parameters specify how the fold changes are generated (e.g.,  $FC =$   
162  $\log_2(\text{sample } y/\text{sample } x)$ ).

```
163 vsMAPlot(x='treated_paired.end', y='untreated_paired.end', data=df.deseq, d.factor='condition',  
164 type='deseq')
```

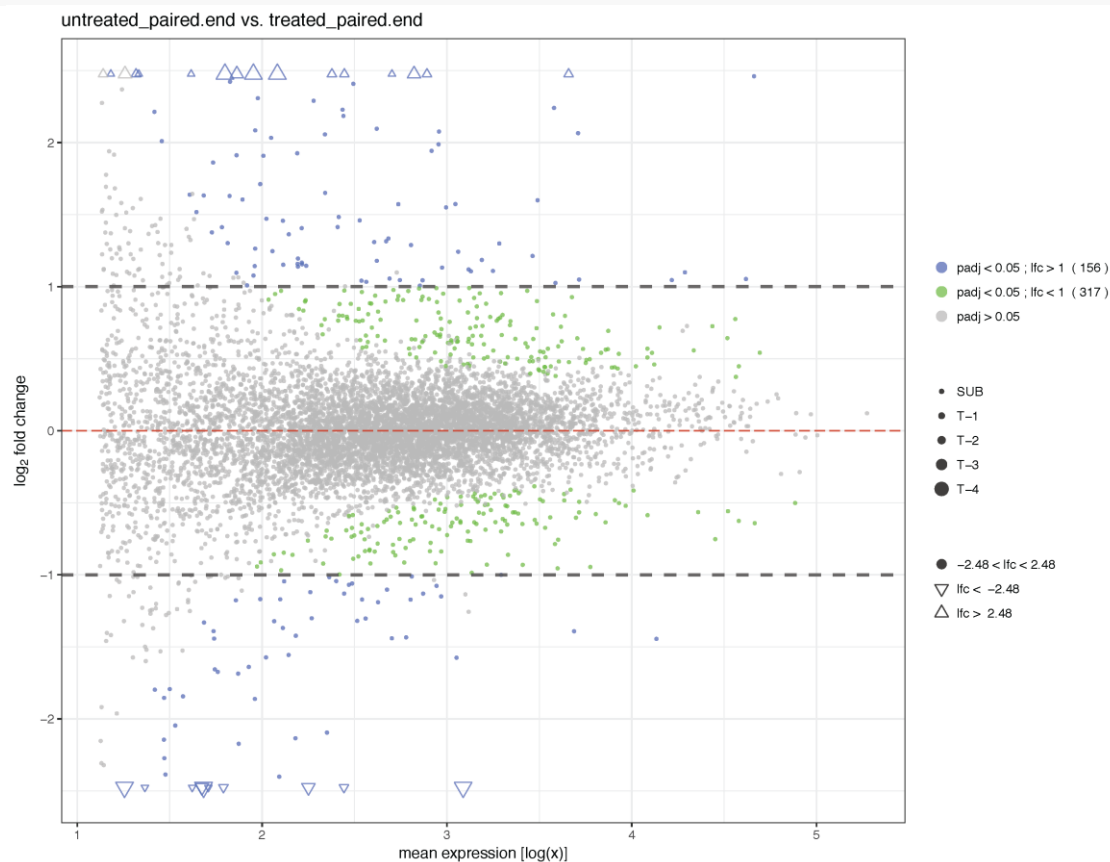

165  
166 **Figure 6.** Visualization generated by the *vsMAPlot* function from the *ViDGER* package using a DESeq2 dataset,  
167 requiring a dataset, factor type, two factor levels, and appropriate tool type. Optional parameters include  
168 inclusion/exclusion of the main title, legend, and grid, manual specification of the y-axis limits, *lfc* threshold (default is  
169 1), and adjusted *p*-value cutoff (default is 0.05), and specification of returning data in tabular form.

170  
171 **(vi) vsMAMatrix** generates a matrix of MA plots for all possible pairwise treatment comparisons  
172 (Figure 7, Example S7). This process, as with the other matrix options, allows users to visualize all  
173 their treatment-based comparisons in one figure. This matrix option also includes counts for each  
174 figure based on *lfc* and adjusted *p*-value thresholds, which can be specified by the user or revert to

175 the default 1 and 0.05, respectively.

176 `vsMAMatrix(data = df.deseq, d.factor = 'condition', type = 'deseq')`

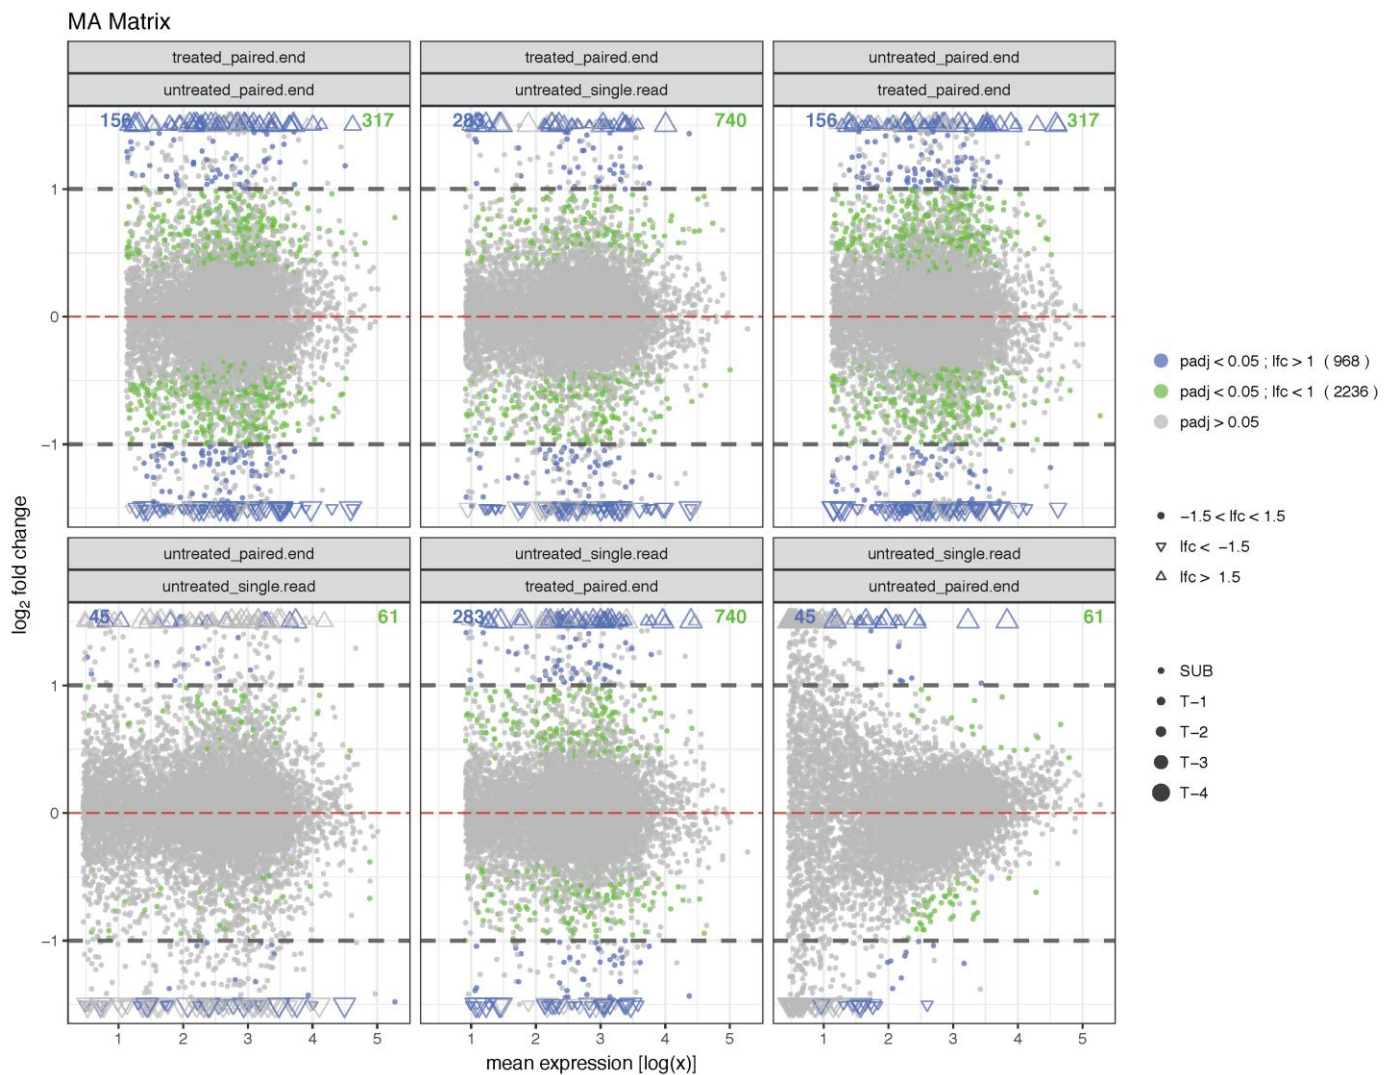

177

178 **Figure 7.** Visualization generated by the `vsMAMatrix` function from the `ViDGER` package using a DESeq2 dataset,  
 179 requiring a dataset, factor type, and appropriate tool type. Optional parameters include inclusion/exclusion of the main  
 180 title, legend, grid, and partitioned counts and manual specification of the x-axis limits, *lfc* threshold (default is 1), and  
 181 adjusted *p*-value cutoff (default is 0.05).

182

183 **(vii) vsVolcano** creates a volcano plot for two treatments comparison by plotting the  $-\log_{10}(p$ -  
 184 value) against the *lfc* (Figure 8, Example S8). As with the `vsMAPlot` function, the `vsVolcano` function  
 185 utilizes coloring schemes to indicate the significance of magnitude of differential expression for the

186 individual data points. Additionally, this function integrates the same data point and sizing structure  
187 to focus the plot window on the majority of the data, indicating outliers in this format.

188 `vsVolcano(x = 'treated_paired.end', y = 'untreated_paired.end', data = df.deseq, d.factor = 'condition', type =`  
189 `'deseq')`

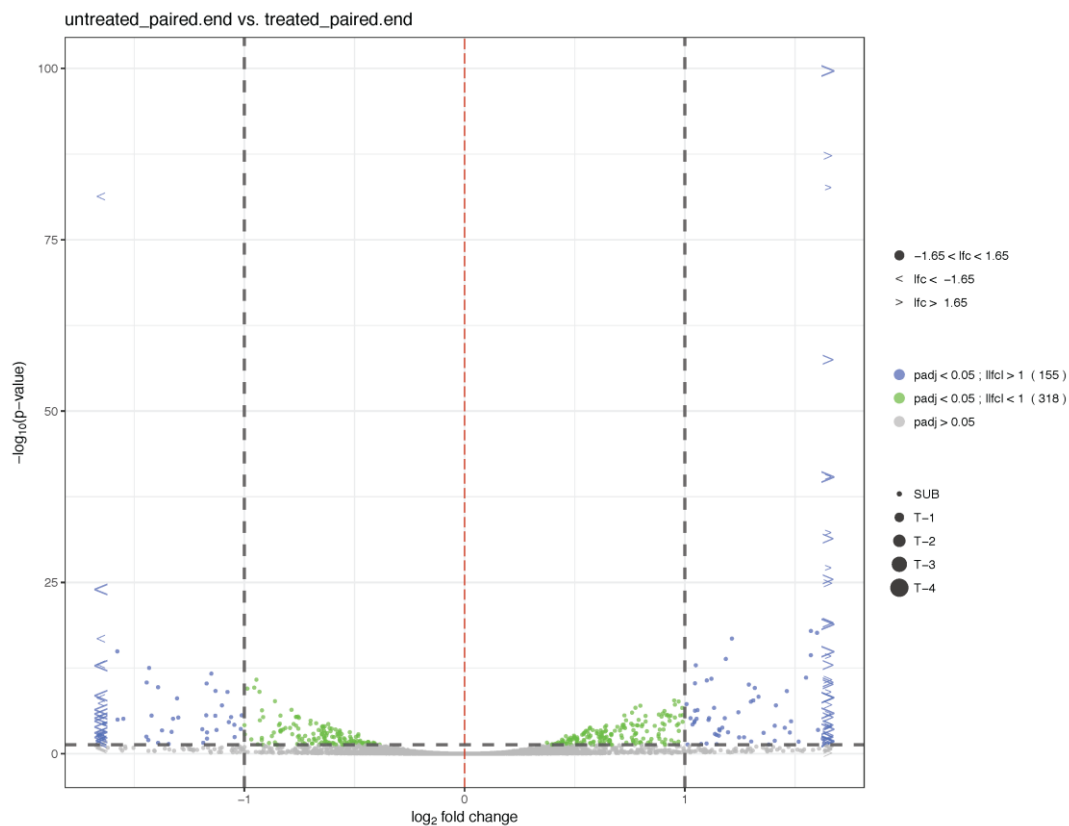

190  
191 **Figure 8.** Visualization generated by the `vsVolcano` function from the ViDGER package using a DESeq2 dataset,  
192 requiring a dataset, factor type, two factor levels, and appropriate tool type. Optional parameters include  
193 inclusion/exclusion of the main title, legend, and grid, manual specification of the x-axis limits, *lfc* threshold (default is  
194 1), and adjusted *p*-value cutoff (default is 0.05), and specification of returning data in tabular form.

195  
196 **(viii) vsVolcanoMatrix** generates a matrix of volcano plots for all possible pairwise treatment  
197 comparison (Figure 9, Example S9). This process, as with the other matrix options, allows users to  
198 visualize all their treatment-based comparisons in one figure. Additionally, to provide a more  
199 comprehensive view with a single figure, we included a count for each separate Volcano plot based  
200 on the number of data points in each section as specified by the *lfc* and adjusted *p*-value thresholds.

201 Although this option may have experience limited use, it would be useful in situations where users  
 202 wish to show mass similarity across all comparisons, highlight the individual or limited deviations, or  
 203 display situations where the comparisons vary widely.

204 `vsVolcanoMatrix(data = df.deseq, d.factor = 'condition', type = 'deseq')`

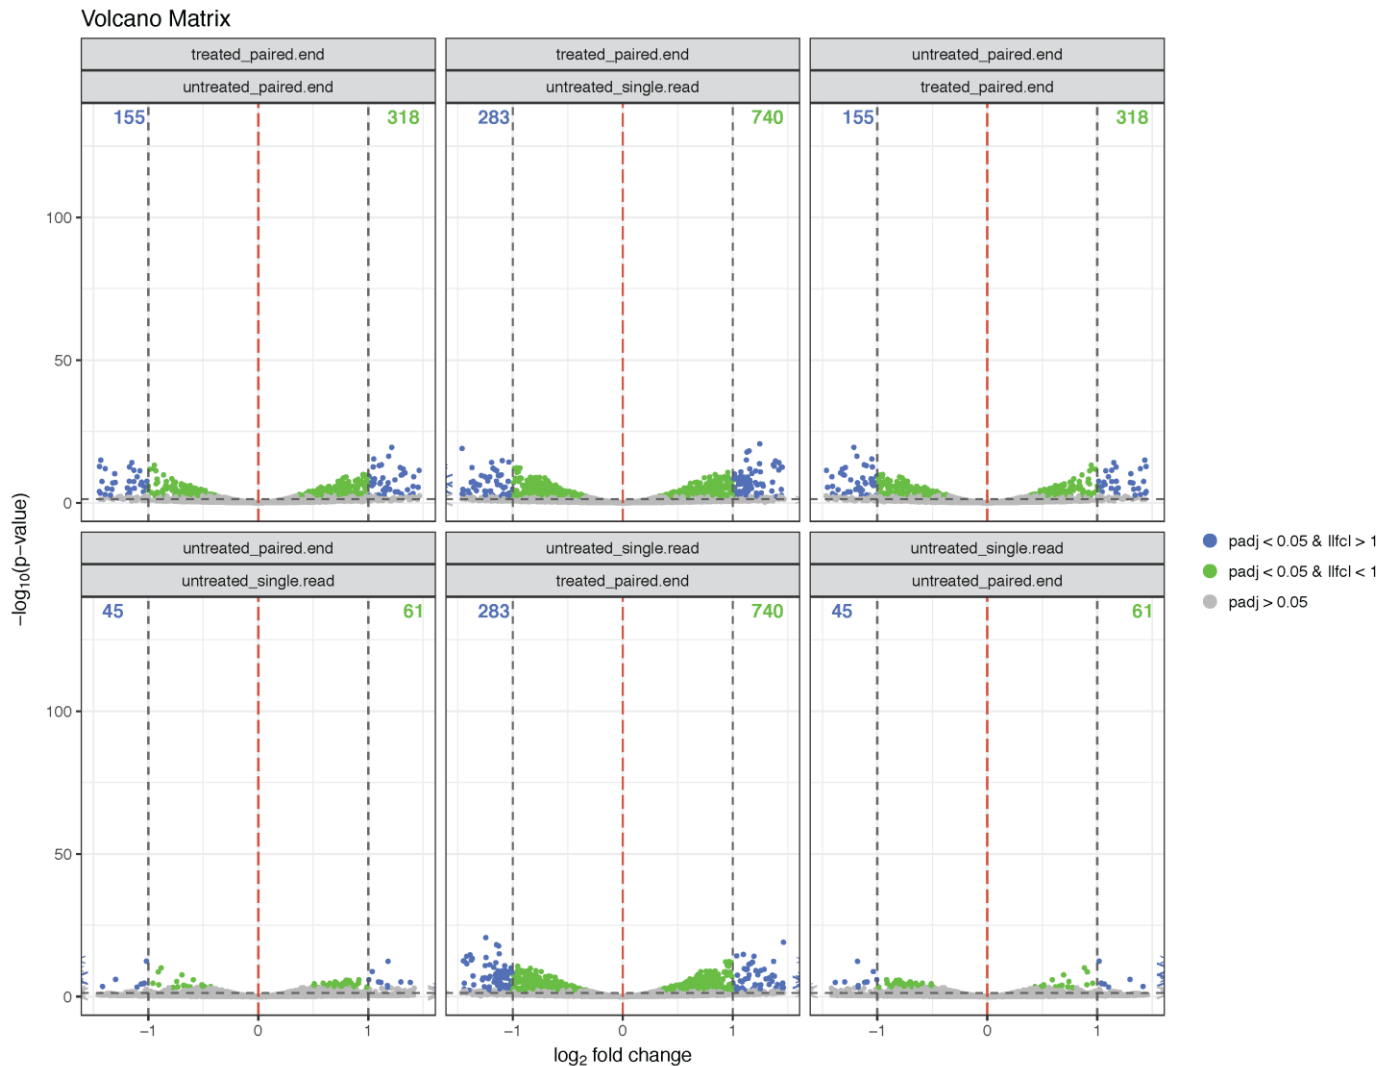

205  
 206 **Figure 9.** Visualization generated by the `vsVolcanoMatrix` function from the ViDGER package using a DESeq2 dataset,  
 207 requiring a dataset, factor type, and appropriate tool type. Optional parameters include inclusion/exclusion of the main  
 208 title, legend, grid, and partitioned counts and manual specification of the y-axis limits, *lfc* threshold (default is 1), and  
 209 adjusted *p*-value cutoff (default is 0.05).

210  
 211 (ix) **vsFourWay** creates a scatter plot comparing the *lfc* between two samples and one control  
 212 (Figure 10, Example S10). This approach is most useful when there are multiple comparisons being  
 213 made against a specific control or relative sample. Using this function, a plot can be generated for

214 visualizing the expression scatterplots, relative to another expression scatterplot. As with the other  
215 two main Tier 2 functions, *vsFourWay* integrates data point features to highlight significant adjusted  
216 *p*-values, over-threshold *lfc*, and outliers. In this function, *x* and *y* arguments are needed, and a  
217 *control* level is also required. Although it is possible to generate a matrix option for the *FourWay* plot,  
218 the authors decided against this because of two main issues. First, the *vsFourWay* function  
219 generates a significant amount of information in a single figure, with nine distinct sections  
220 representing nine distinct combinations of relative *lfc*. Creating a matrix visualization with this figure  
221 would then force each *FourWay* plot to be too small to collect meaningful interpretations from, thus  
222 counteracting the purpose of the package. Secondly, the *vsFourWay* function already requires  
223 three factor levels for comparison—one reference level and two comparison levels. A matrix option  
224 for this functionality would then require a minimum of four factor levels, with at least five factor levels  
225 being preferred to generate a fully-informative matrix option. This requirement would potentially put  
226 most applications out of the scope of the matrix option for the *vsFourWay* function.

```
227 vsFourWay(x = 'treated_paired.end', y = 'untreated_single.end', control = 'untreated_paired.end', data =  
228 df.deseq, d.factor = 'condition', type = 'deseq')
```

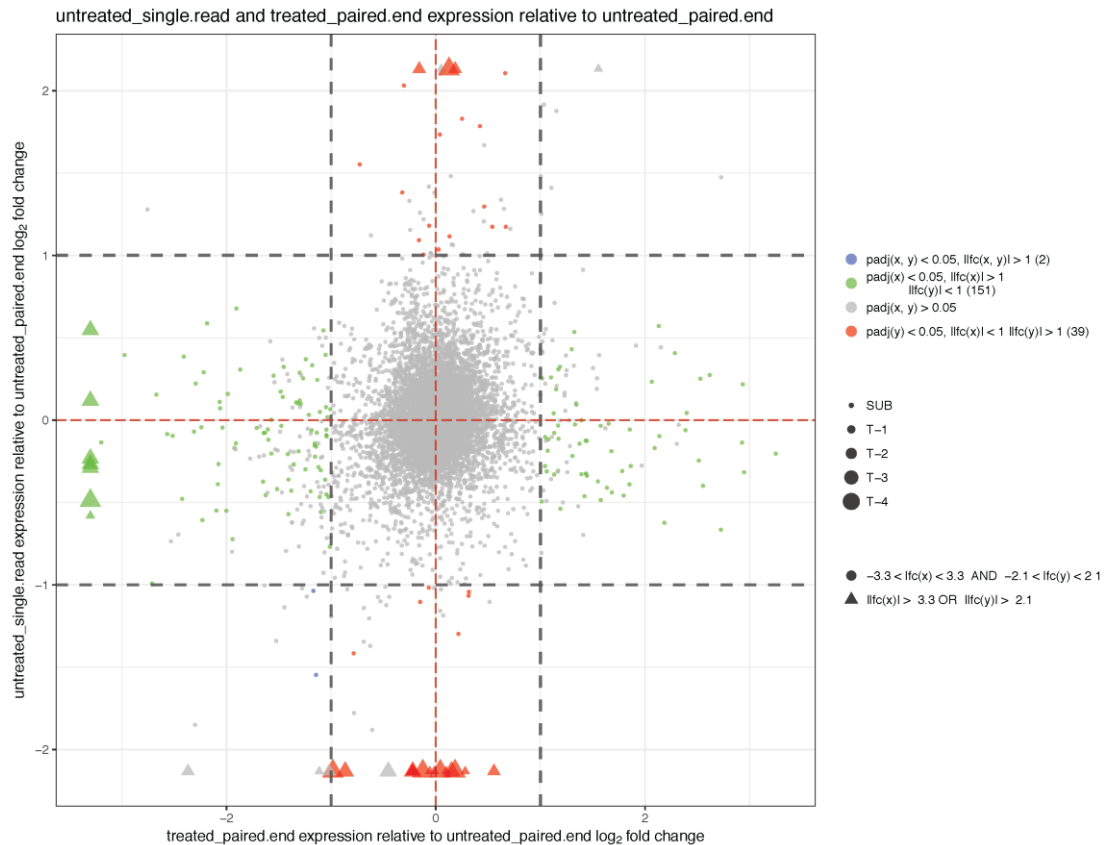

229

230

231

232

233

234

235

236

237

238

239

240

241

242

243

244

**Figure 10.** Visualization generated by the *vsFourWay* function from the *VIDGER* package using a DESeq2 dataset, requiring a dataset, factor type, two factor levels, reference factor level, and appropriate tool type. Optional parameters include inclusion/exclusion of the main title, legend, and grid, manual specification of the x- and y-axis limits, *lfc* threshold (default is 1), and adjusted *p*-value cutoff (default is 0.05), and specification or returning data in tabular form.

## Data Extraction

It is noteworthy that functions **(v)**, **(vii)**, and **(ix)** can return interpreting results shown in the visualizations for further analysis and interpretation (Table 2). The data extracted contains all relevant information used to generate the specified figure, including mean expression for the *x*, *y*, and *control* (in the *vsFourWay* function) factor levels, x- and y-axis values for the relevant figure, an 'isDE' column indicating whether the gene ID is differentially expressed based on the adjusted *p*-value threshold, 'color' indicating the color of the data point in the figure—which corresponds to the *lfc* and adjusted *p*-value thresholds—and 'size' indicating whether the data point is on the plot or an outlier and magnitude of that outlier. The data extraction is accomplished by setting the *data.return* parameter to *TRUE*.



```

245 tmp <- vsVolcano(x = 'treated_paired.end', y = 'untreated_paired.end', data = df.deseq, d.factor =
246 'condition', type = 'deseq', data.return = TRUE)
247 df.tmp <- tmp$data; head(df.tmp)
248 write.csv(df.tmp, file = 'df.tmp.csv ')

```

249

250 **Table 2.** Data extraction from the *vsVolcano* function from the *VIDGER* package using a DESeq2 dataset.

251 This is the same parameterization as used in Figure 8, except *data.return = TRUE*. This modification will

252 allow the user to extract relevant data from the figure. In this case, the extracted data frame includes mean

253 expression values for the *x* and *y* factor levels,  $\log_2$  fold change (*logFC*), *p*-value (*pval*), adjusted *p*-value

254 (*padj*), 'isDE' which represents whether the differential expression is significant, 'color' which signifies the

255 color of the data point corresponding to the adjusted *p*-value and *lfc* thresholds, and 'size' which indicates

256 whether the data point is within the plot frame or an outlier of a particular magnitude.

|             | x        | y        | logFC    | pval     | padj     | isDE  | color | size |
|-------------|----------|----------|----------|----------|----------|-------|-------|------|
| FBgn0000008 | 7.922277 | 8.322253 | 0.071059 | 0.828806 | 0.974685 | FALSE | grey  | sub  |
| FBgn0000017 | 318.9575 | 383.2851 | 0.265054 | 0.090161 | 0.467683 | FALSE | grey  | sub  |
| FBgn0000018 | 30.25862 | 31.26999 | 0.047433 | 0.801233 | 0.971289 | FALSE | grey  | sub  |
| FBgn0000032 | 72.34193 | 72.90323 | 0.011151 | 0.949842 | 0.993072 | FALSE | grey  | sub  |
| FBgn0000037 | 1.539581 | 0.812298 | -0.92246 | 0.231142 | 0.700057 | FALSE | grey  | sub  |
| FBgn0000042 | 7928.525 | 5600.305 | -0.50155 | 0.000611 | 0.013572 | TRUE  | green | sub  |
| FBgn0000043 | 3273.939 | 1943.285 | -0.75253 | 7.96E-08 | 5.68E-06 | TRUE  | green | sub  |
| FBgn0000044 | 2.222025 | 1.599588 | -0.47417 | 0.456526 | 0.872166 | FALSE | grey  | sub  |
| FBgn0000046 | 2.235611 | 1.530254 | -0.5469  | 0.439278 | 0.865892 | FALSE | grey  | sub  |
| FBgn0000052 | 187.1546 | 201.4374 | 0.106101 | 0.498756 | 0.889058 | FALSE | grey  | sub  |
| FBgn0000053 | 200.4191 | 161.0824 | -0.31522 | 0.03254  | 0.260826 | FALSE | grey  | sub  |
| FBgn0000054 | 50.24601 | 52.8436  | 0.07272  | 0.675076 | 0.949335 | FALSE | grey  | sub  |
| FBgn0000057 | 56.88491 | 55.52939 | -0.03479 | 0.831612 | 0.974685 | FALSE | grey  | sub  |
| FBgn0000063 | 34.43974 | 27.58587 | -0.32014 | 0.084865 | 0.453512 | FALSE | grey  | sub  |
| FBgn0000064 | 738.3808 | 597.9759 | -0.30428 | 0.010905 | 0.125567 | FALSE | grey  | sub  |
| FBgn0000071 | 54.98497 | 9.358834 | -2.55464 | 1.98E-27 | 1.17E-24 | TRUE  | blue  | t4   |
| FBgn0000077 | 17.98973 | 17.58636 | -0.03272 | 0.898181 | 0.985072 | FALSE | grey  | sub  |
| FBgn0000078 | 1.743642 | 3.473474 | 0.994276 | 0.058949 | 0.37159  | FALSE | grey  | sub  |
| FBgn0000079 | 9.722732 | 21.87556 | 1.169886 | 3.45E-06 | 0.000156 | TRUE  | blue  | sub  |

257



## 258 Implementation

259 **ViDGER** is a package developed for the R environment ( $\geq 3.3.2$ ) and is freely available at  
260 <https://github.com/btmonier/vidger>. Several package dependencies are required, i.e., *ggplot2* [32], *ggally*  
261 [33], *dplyr* [34], and *tidyr* [35]. Currently, it is compatible with three commonly used DGE analysis packages,  
262 which are *Cuffdiff*, *edgeR*, and *DESeq2*. Function efficiency varies depending on what type of RNA-seq  
263 package is used. Functions used for *Cuffdiff* and *edgeR* objects complete in  $< 1$ s and while *DESeq2* objects  
264 can take up to 5s to complete. *DESeq2* objects take longer to process due to the nature of the object, which  
265 contains more stored information than the relatively simple objects for *Cuffdiff* and *edgeR*. One exception  
266 is the volcano plot matrix function (**vii**). *Cuffdiff* and *edgeR* objects took  $< 10$ s to complete while *DESeq2*  
267 objects took  $>10$ s (Method S2). Calculations were performed on three toy data sets from *Cuffdiff*, *DESeq2*,  
268 and *edgeR* outputs. Additionally, we tested the robustness of this package on multiple large-scale RNA-seq  
269 datasets from human and plant samples (Example S1). All computations were performed on a computer with  
270 a 64-bit Windows 10 operating system, 8 GB of RAM, and an Intel Core i5-6400 processor running at 2.7  
271 GHz.

## 273 Conclusions

274 DEGs are frequently used to determine genotypical differences between two or more conditions of cells, in  
275 support of specific hypothesis-driven studies. Interpretation of this information can benefit significantly from  
276 the graphical representation of results files. We have created an R package to assist in the process of  
277 generating publication quality figures of DGE results files from *Cuffdiff*, *DESeq2*, and *edgeR*. We believe that  
278 this package will greatly assist biologists and bioinformaticians in their interpretations of DGE results. Utilizing  
279 this package will provide a straightforward method for comprehensively viewing DEGs between samples of  
280 interest and allows researchers to generate usable figures for furthered dissemination of their DGE studies.

## 282 Key Points

- The ViDGER R package provides a straightforward method for visualizing DGE results files.
- This package integrates DGE results from the three most commonly used DGE tools: DESeq2, edgeR, & Cuffdiff.
- Nine functions are provided, including six distinct visualizations with three matrix options.
- The generated visualizations provide comprehensive views of the DGE results files in highly-informative, publication-quality figures, all of which can be extracted in multiple formats.
- ViDGER also provides a useful method for extracting relevant data from the generated figures, which is useful for further interpretation of the DGE results.

## Supplemental Materials

A supplemental file is included with this manuscript that provides more detailed information on the implementation and applications of the ViDGER R/Bioconductor package.

## Acknowledgement

We thank our collaborators for their insightful suggestions on this manuscript and pipeline testing.

## Funding

This work was supported by National Science Foundation / EPSCoR Award No. IIA-1355423, the State of South Dakota Research Innovation Center and the Agriculture Experiment Station of South Dakota State University (SDSU). Support for this project was also provided by the National Institutes of Health (U01 project, grant number 6U01HG007253-03) and Sanford Health–SDSU Collaborative Research Seed Grant Program. This work used the Extreme Science and Engineering Discovery Environment (XSEDE), which is supported by National Science Foundation (grant number ACI-1548562).

## References

- 308 1. Finotello F, Di Camillo B. Measuring differential gene expression with RNA-seq: challenges and  
309 strategies for data analysis, *Brief Funct Genomics* 2015;14:130-142.
- 310 2. Wang Z, Gerstein M, Snyder M. RNA-Seq: a revolutionary tool for transcriptomics, *Nature reviews*  
311 *genetics* 2009;10:57-63.
- 312 3. Trapnell C, Hendrickson DG, Sauvageau M et al. Differential analysis of gene regulation at transcript  
313 resolution with RNA-seq, *Nat Biotechnol* 2013;31:46.
- 314 4. Trapnell C, Roberts A, Goff L et al. Differential gene and transcript expression analysis of RNA-seq  
315 experiments with TopHat and Cufflinks, *Nat Protoc* 2012;7:562-578.
- 316 5. Robinson MD, McCarthy DJ, Smyth GK. edgeR: a Bioconductor package for differential expression  
317 analysis of digital gene expression data, *Bioinformatics* 2010;26:139-140.
- 318 6. Love MI, Huber W, Anders S. Moderated estimation of fold change and dispersion for RNA-seq data  
319 with DESeq2, *Genome Biol* 2014;15:550.
- 320 7. Li B, Dewey CN. RSEM: accurate transcript quantification from RNA-Seq data with or without a  
321 reference genome, *BMC Bioinformatics* 2011;12:323.
- 322 8. Wu J, Anczukow O, Krainer AR et al. OLego: fast and sensitive mapping of spliced mRNA-Seq reads  
323 using small seeds, *Nucleic Acids Res* 2013;41:5149-5163.
- 324 9. Bonfert T, Kirner E, Csaba G et al. ContextMap 2: fast and accurate context-based RNA-seq mapping,  
325 *BMC Bioinformatics* 2015;16:122.
- 326 10. Wang K, Singh D, Zeng Z et al. MapSplice: accurate mapping of RNA-seq reads for splice junction  
327 discovery, *Nucleic Acids Res* 2010;38:e178.
- 328 11. Philippe N, Salson M, Combes T et al. CRAC: an integrated approach to the analysis of RNA-seq reads,  
329 *Genome Biol* 2013;14:R30.
- 330 12. Wu TD, Reeder J, Lawrence M et al. GMAP and GSNAP for Genomic Sequence Alignment:  
331 Enhancements to Speed, Accuracy, and Functionality, *Methods Mol Biol* 2016;1418:283-334.
- 332 13. Dobin A, Davis CA, Schlesinger F et al. STAR: ultrafast universal RNA-seq aligner, *Bioinformatics*  
333 2013;29:15-21.

- 334 14. Trapnell C, Pachter L, Salzberg SL. TopHat: discovering splice junctions with RNA-Seq, *Bioinformatics*  
335 2009;25:1105-1111.
- 336 15. Kim D, Langmead B, Salzberg SL. HISAT: a fast spliced aligner with low memory requirements, *Nat*  
337 *Methods* 2015;12:357-360.
- 338 16. Yuan L, Yu Y, Zhu Y et al. GAAP: Genome-organization-framework-Assisted Assembly Pipeline for  
339 prokaryotic genomes, *BMC Genomics* 2017;18:952.
- 340 17. Ye C, Hill CM, Wu S et al. DBG2OLC: efficient assembly of large genomes using long erroneous reads  
341 of the third generation sequencing technologies, *Scientific reports* 2016;6:31900.
- 342 18. Goodwin S, Gurtowski J, Ethe-Sayers S et al. Oxford Nanopore sequencing, hybrid error correction, and  
343 de novo assembly of a eukaryotic genome, *Genome Res* 2015;25:1750-1756.
- 344 19. Chang Z, Li G, Liu J et al. Bridger: a new framework for de novo transcriptome assembly using RNA-  
345 seq data, *Genome Biol* 2015;16:30.
- 346 20. Grabherr MG, Haas BJ, Yassour M et al. Full-length transcriptome assembly from RNA-Seq data without  
347 a reference genome, *Nat Biotechnol* 2011;29:644-652.
- 348 21. Pertea M, Pertea GM, Antonescu CM et al. StringTie enables improved reconstruction of a transcriptome  
349 from RNA-seq reads, *Nat Biotechnol* 2015;33:290-295.
- 350 22. Sahraeian SME, Mohiyuddin M, Sebra R et al. Gaining comprehensive biological insight into the  
351 transcriptome by performing a broad-spectrum RNA-seq analysis, *Nature communications* 2017;8:59.
- 352 23. Seyednasrollah F, Laiho A, Elo LL. Comparison of software packages for detecting differential  
353 expression in RNA-seq studies, *Brief Bioinform* 2013;16:59-70.
- 354 24. Kvam VM, Liu P, Si Y. A comparison of statistical methods for detecting differentially expressed genes  
355 from RNA-seq data, *American journal of botany* 2012;99:248-256.
- 356 25. Goff L TCaKD. cummeRbund: Analysis, exploration, manipulation, and visualization of Cufflinks high-  
357 throughput sequencing data. 2013.
- 358 26. Ritchie ME, Phipson B, Wu D et al. limma powers differential expression analyses for RNA-sequencing  
359 and microarray studies, *Nucleic Acids Res* 2015;43:e47-e47.

- 360 27. Wang L, Feng Z, Wang X et al. DEGseq: an R package for identifying differentially expressed genes  
361 from RNA-seq data, *Bioinformatics* 2009;26:136-138.
- 362 28. Hardcastle TJ, Kelly KA. baySeq: empirical Bayesian methods for identifying differential expression in  
363 sequence count data, *BMC Bioinformatics* 2010;11:422.
- 364 29. Li J, Tibshirani R. Finding consistent patterns: a nonparametric approach for identifying differential  
365 expression in RNA-Seq data, *Statistical methods in medical research* 2013;22:519-536.
- 366 30. Tarazona S, García F, Ferrer A et al. NOIseq: a RNA-seq differential expression method robust for  
367 sequencing depth biases, *EMBnet. journal* 2012;17:pp. 18-19.
- 368 31. Huber WRA. pasilla: Data package with per-exon and per-gene read counts of RNA-seq samples of  
369 Pasilla knock-down by Brooks et al., *Genome Research* 2011., 2017.
- 370 32. Wickham H. ggplot2: elegant graphics for data analysis. Springer, 2016.
- 371 33. Schloerke B, Crowley J, Cook D et al. Ggally: Extension to ggplot2. 2011.
- 372 34. Wickham H, Francois R. dplyr: A grammar of data manipulation, R package version 0.4 2015;1:20.
- 373 35. Wickham H. tidyr: Easily Tidy Data with spread () and gather () Functions, R package version 0.2. 0  
374 2014.

375
